# Supplementary material
Source: publisher figshare collection journal article supplement (https://gsajournals.figshare.com/ndownloader/files/27743268)
Supplement: Supplementary file 1 [file 27743268]

| **Table S6.** *Hypomesus nipponensis* short read sequencing statistics. | | | | |
| --- | --- | --- | --- | --- |
| **Index** | **Raw** | **Trimming** | **Contaminant** | **Clean** |
| Number of reads | 366,202,454 | 340,181,463 | 96,018,025 | 248,140,673 |
| Number of base pairs | 36,986,447,854 | 33,153,910,818 | 9,503,588,111 | 24,408,402,324 |
| Number of reads (%) | 100 | 92.89 | 25.13 | 67.76 |
| Number of base pairs (%) | 100 | 89.64 | 23.65 | 65.99 |
